# Supplementary material for: Second harmonic generation microscopy of collagen organization in tunable, environmentally responsive alginate hydrogels
Source: Royal Society of Chemistry journal article supplement (doi:10.1039/c8bm01535j), 2019-01-01

# **Second harmonic generation microscopy of collagen organization in tunable, environmentally responsive alginate hydrogels**

*Anuraag Boddupalli,<sup>1</sup> Kaitlin M. Bratlie,<sup>1,2,3,\*</sup>*

<sup>1</sup> Department of Chemical & Biological Engineering, Iowa State University, Ames, Iowa 50011

<sup>2</sup>Department of Materials Science & Engineering, Iowa State University, Ames, Iowa 50011

<sup>3</sup>Ames National Laboratory, Ames, Iowa 50011

**RECEIVED DATE:**

**CORRESPONDING AUTHOR FOOTNOTE**

\*To whom correspondence should be addressed: Tel: 515-294-7304, Fax: 515-294-5444, E-mail: [kbratlie@iastate.edu](mailto:kbratlie@iastate.edu)

**Supplementary Figure 1:** (A) Schematic of methacrylation of medium viscosity alginic acid (B)  $^1\text{H}$  NMR spectra of alginate and methacrylated alginate. Methacrylation of the alginate confirmed by peaks from methylene groups at  $\delta = 5.6$  and  $\delta = 6.0$  ppm.

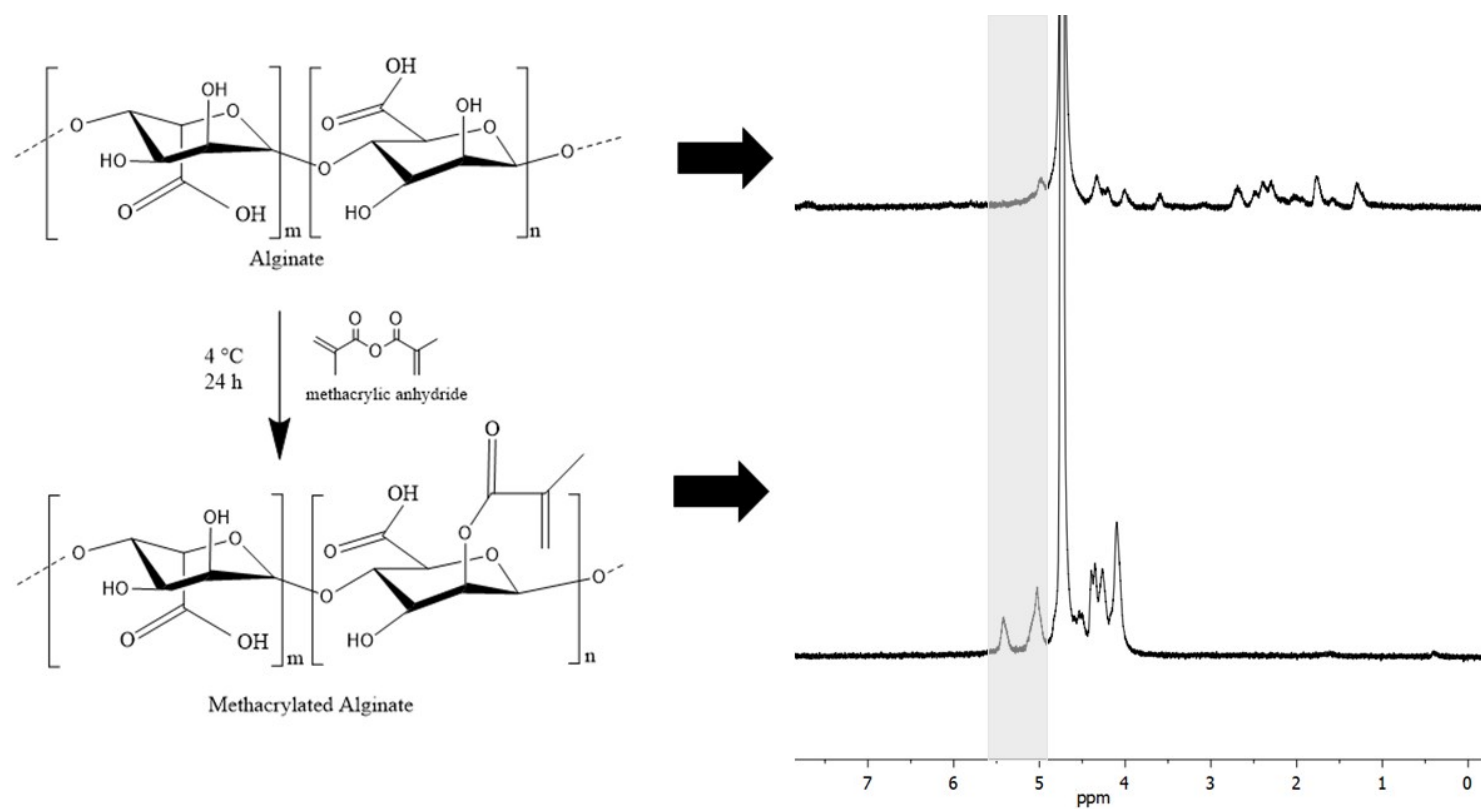

**Supplementary Figure 2:** Normalized collagen levels plotted against the Young's modulus of the different ALGMA hydrogels, as measured on day 7 (A) and day 10 (B). Data represents the mean  $\pm$  SD. n = 3.

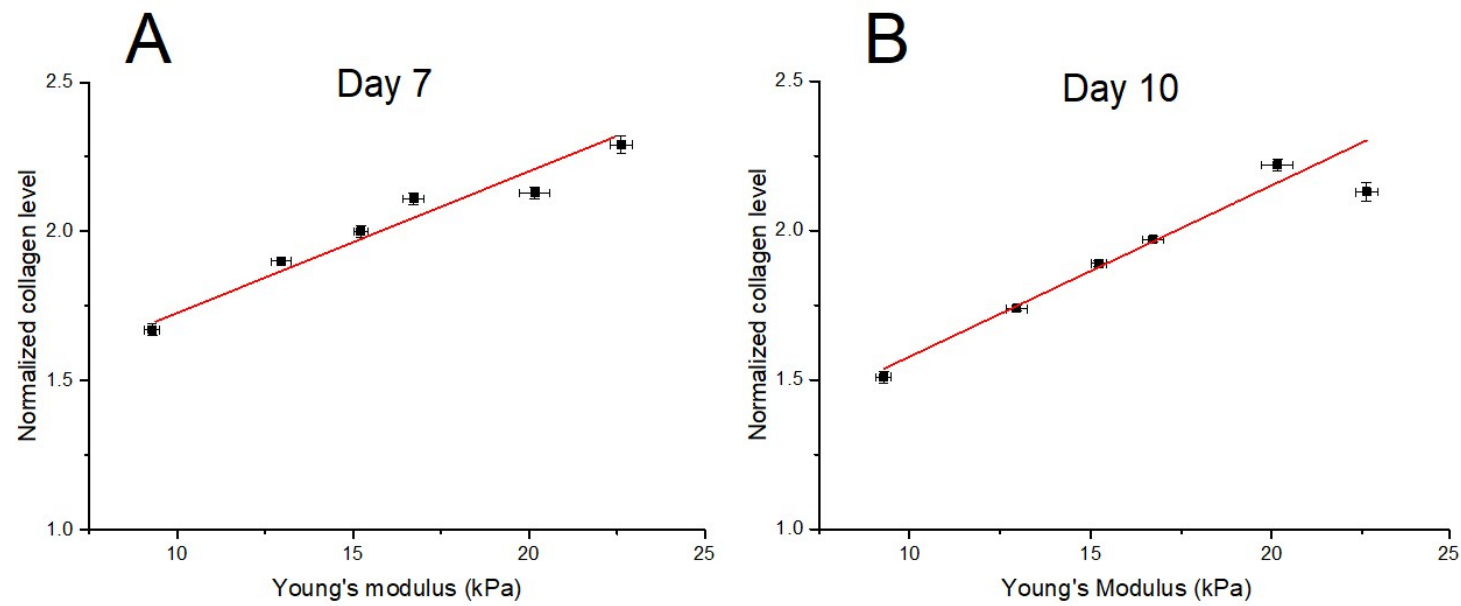

**Supplementary Figure 3:** Histograms of collagen organization obtained for collagen secreted by NIH 3T3 fibroblasts encapsulated in the ALGMA hydrogels. The bars represent experimentally acquired data. The red line is the Gaussian fit to the data.

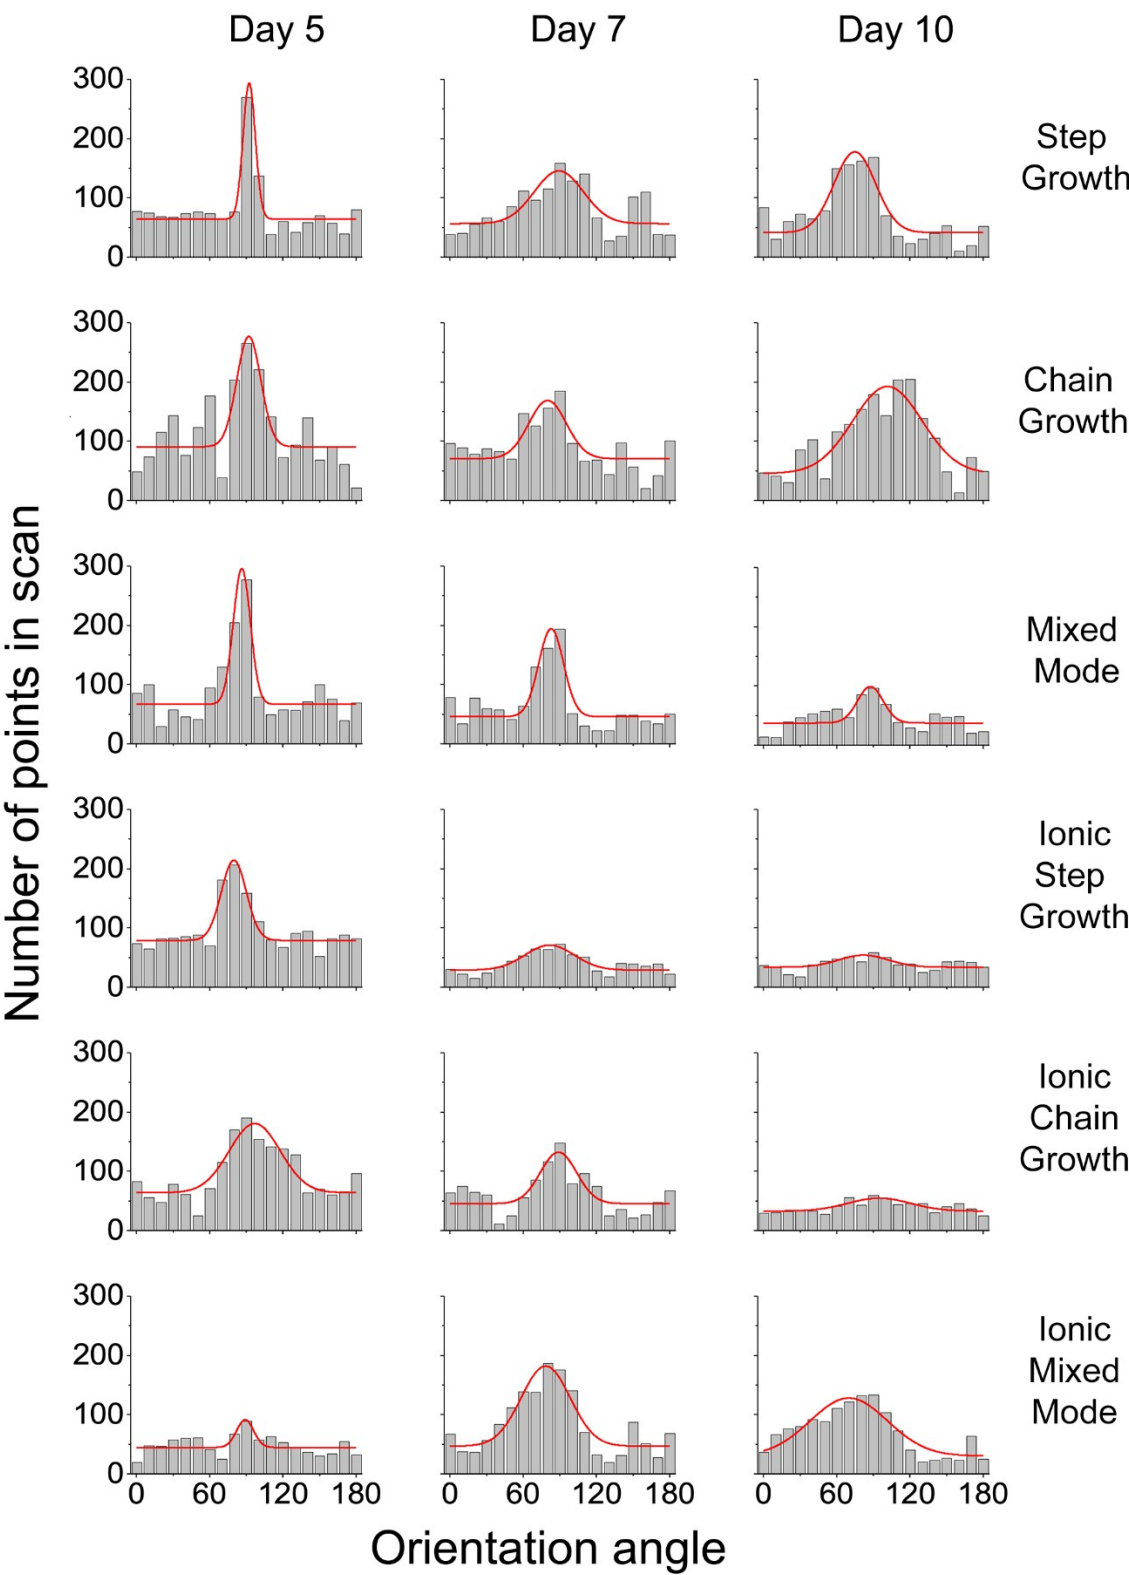

Supplement: c8bm01535j1.pdf [file c8bm01535j1.pdf]
